# Supplementary material for: Range Variability in CMR Feature Tracking Multilayer Strain across Different Stages of Heart Failure
Source: Springer Nature journal article supplement (doi:10.1038/s41598-019-52683-8), 2019-11-11
Supplement: MOESM1 [file 41598_2019_52683_MOESM1_ESM.pdf]

# Supplementary Information

## Range Variability in CMR Feature Tracking Multilayer Strain across Different Stages of Heart Failure

Radu Tanacli <sup>1</sup>, Djawid Hashemi <sup>2,3</sup>, Tomas Lapinskas <sup>1</sup>, Frank Edelmann <sup>2,3</sup>, Rolf Gebker <sup>1,3</sup>,  
Gianni Pedrizzetti <sup>4</sup>, Andreas Schuster <sup>5</sup>, Eike Nagel <sup>6</sup>, Burkert Pieske <sup>1,2,3</sup>, Hans-Dirk  
Düngen <sup>2,3</sup>,  
Sebastian Kelle <sup>1,2,3</sup>

<sup>1</sup> Department of Cardiology, German Heart Centre Berlin, Berlin, Germany

<sup>2</sup> Department of Cardiology, Charité University Medicine Berlin, Berlin, Germany.

<sup>3</sup> German Centre for Cardiovascular Research DZHK, Partner Site Berlin, Berlin, Germany.

<sup>4</sup> Department of Engineering and Architecture, University of Trieste, Trieste, Italy.

<sup>5</sup> Department of Cardiology and Pulmonology and German Centre for Cardiovascular  
Research (DZHK) Partner Site, Göttingen, Germany.

<sup>6</sup> Institute of Experimental and Translational Cardiac Imaging, DZHK Centre for  
Cardiovascular Imaging, Goethe University Hospital Frankfurt, Frankfurt am Main, Germany.

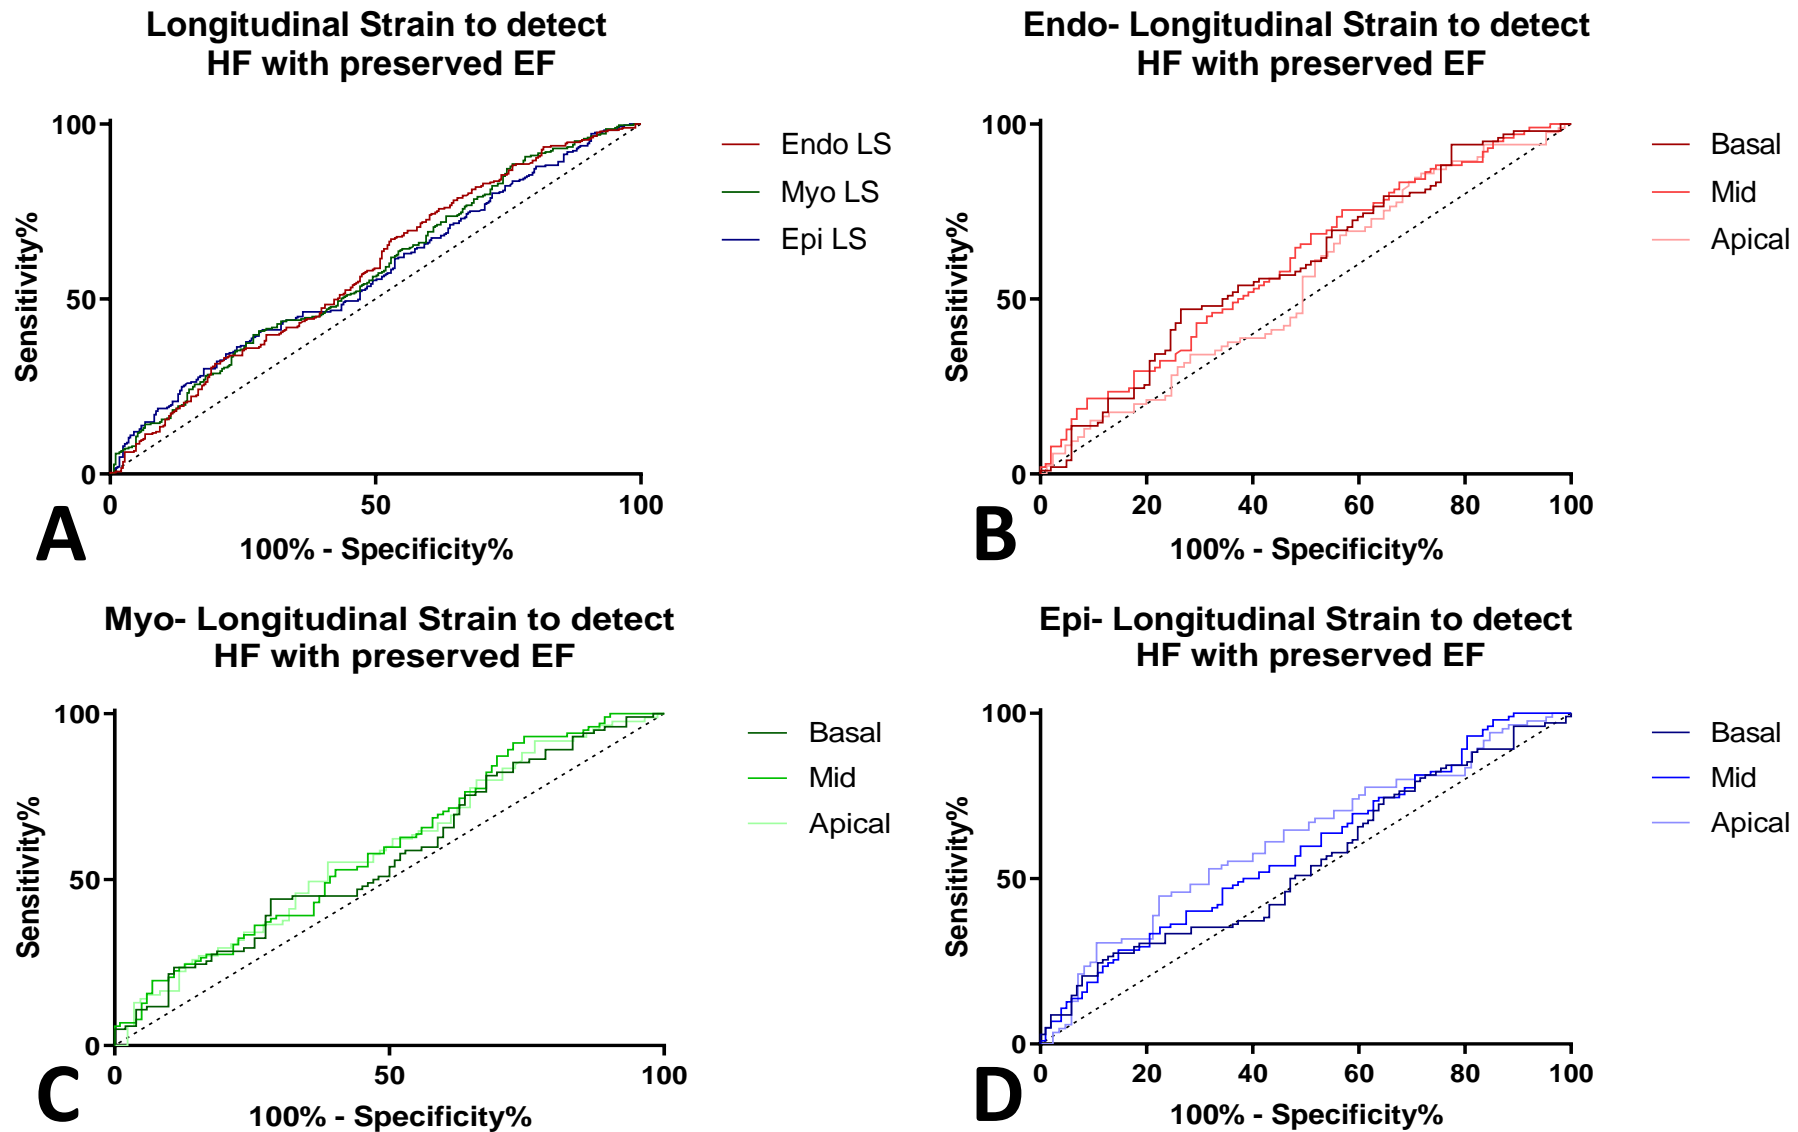

**Supplement Figure 1.** ROC analysis to discriminate patients with HF with preserved EF from Normal Subjects with multilayer longitudinal strain A) global segmental values, and B) regional basal segmental values, C) regional mid-ventricular segmental values, D) regional apical segmental values. (Endo LS – sub-endocardial longitudinal strain, Myo LS – mid-myocardial longitudinal strain, Epi LS, sub-epicardial longitudinal strain.

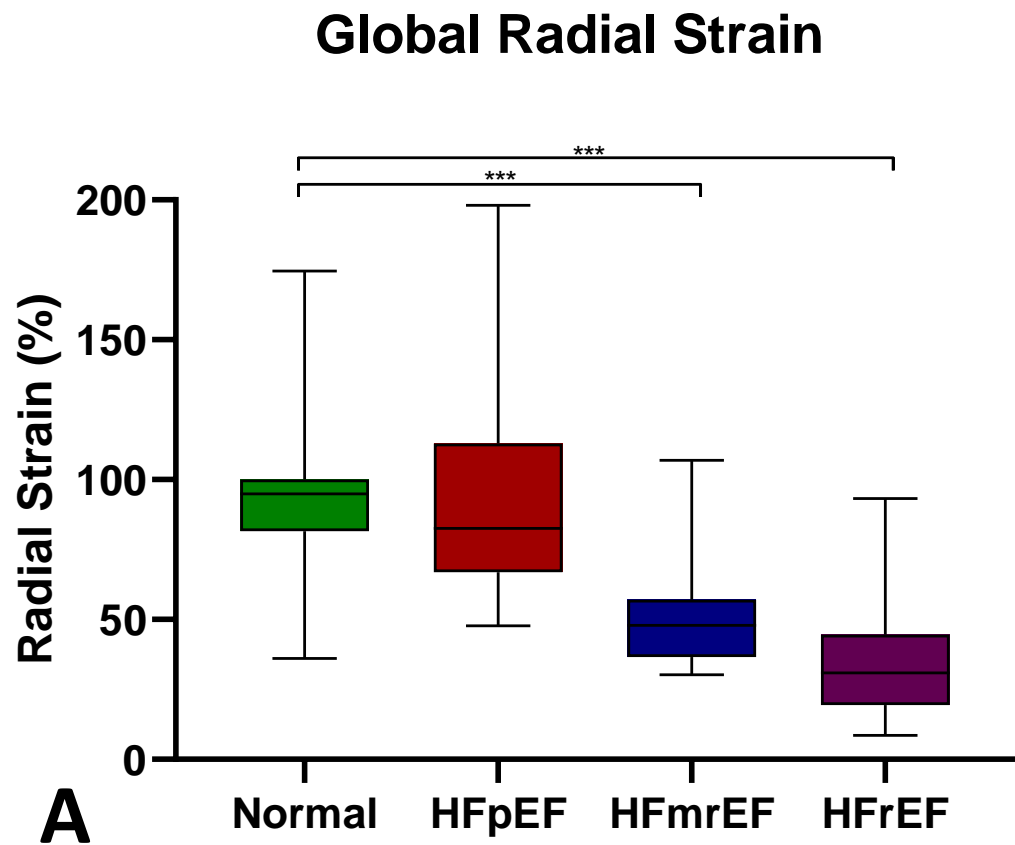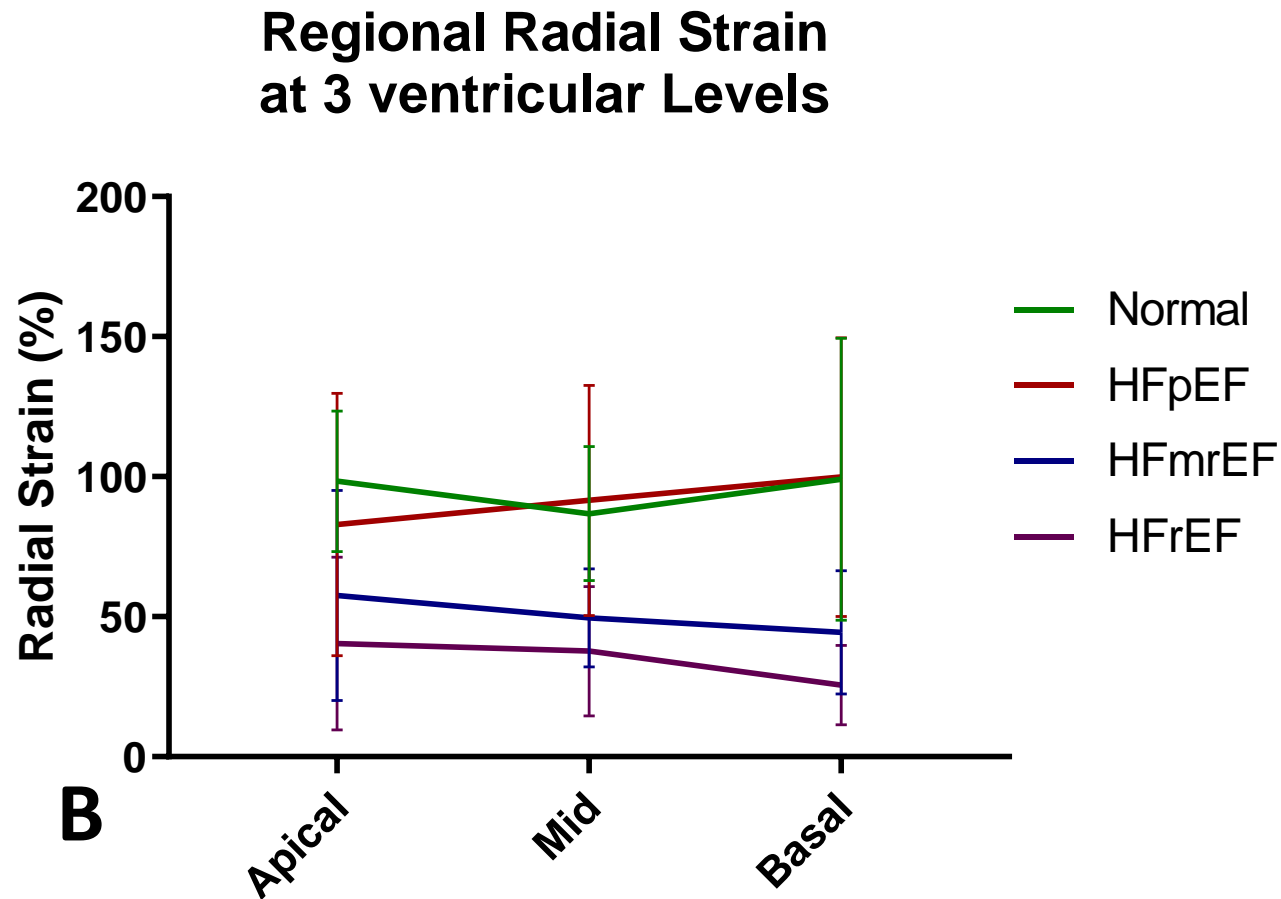

**Supplement Figure 2.** Monolayer assessment of A) Global and B) Regional Radial Strain. **Normal** – normal age-, gender- matched control, **HFpEF** – patients with HF with preserved EF, **HFmrEF** – patients with HF with mid-range reduced EF, **HFrfEF** – patients with HF with reduced EF.

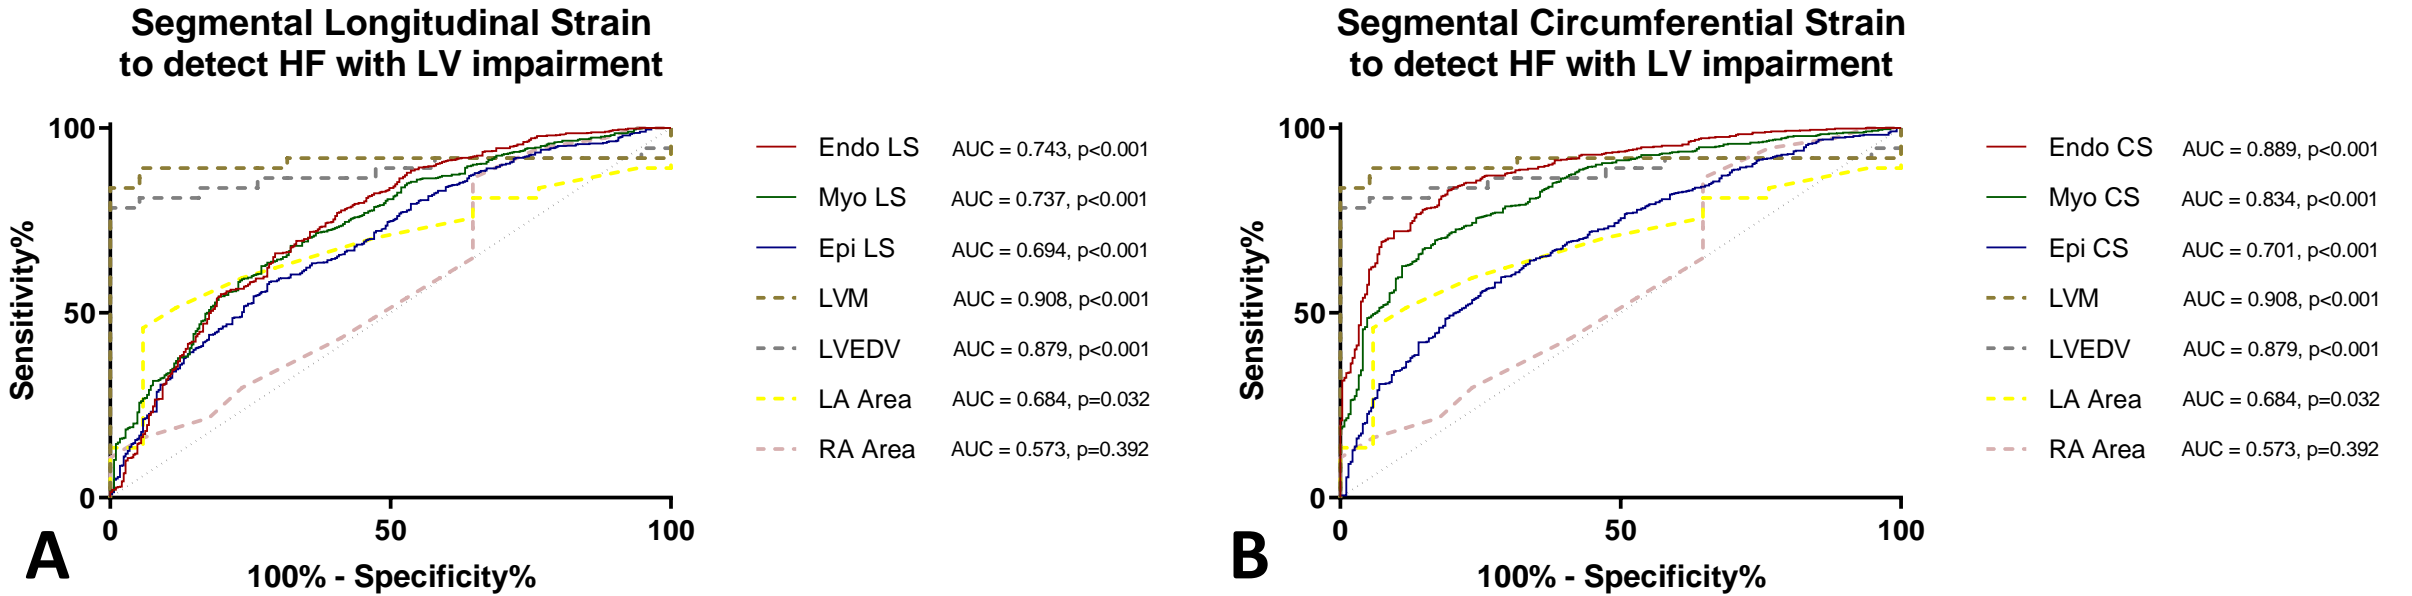

**Supplement Figure 3.** ROC analysis to discriminate patients with HF with LV impairment from Normal Subjects of multilayer A) Longitudinal Strain, and B) Circumferential Strain (Endo LS – sub-endocardial longitudinal strain, Myo LS – mid-myocardial longitudinal strain, Epi LS, sub-epicardial longitudinal strain, Endo CS – sub-endocardial circumferential strain, Myo CS – mid-myocardial circumferential strain, Epi CS, sub-epicardial circumferential strain ). Dotted lines represent respectively LVM – indexed left ventricular mass, LVEDV – indexed LV end-diastolic volume, LA and RA area – indexed left atrial and right atrial areas.

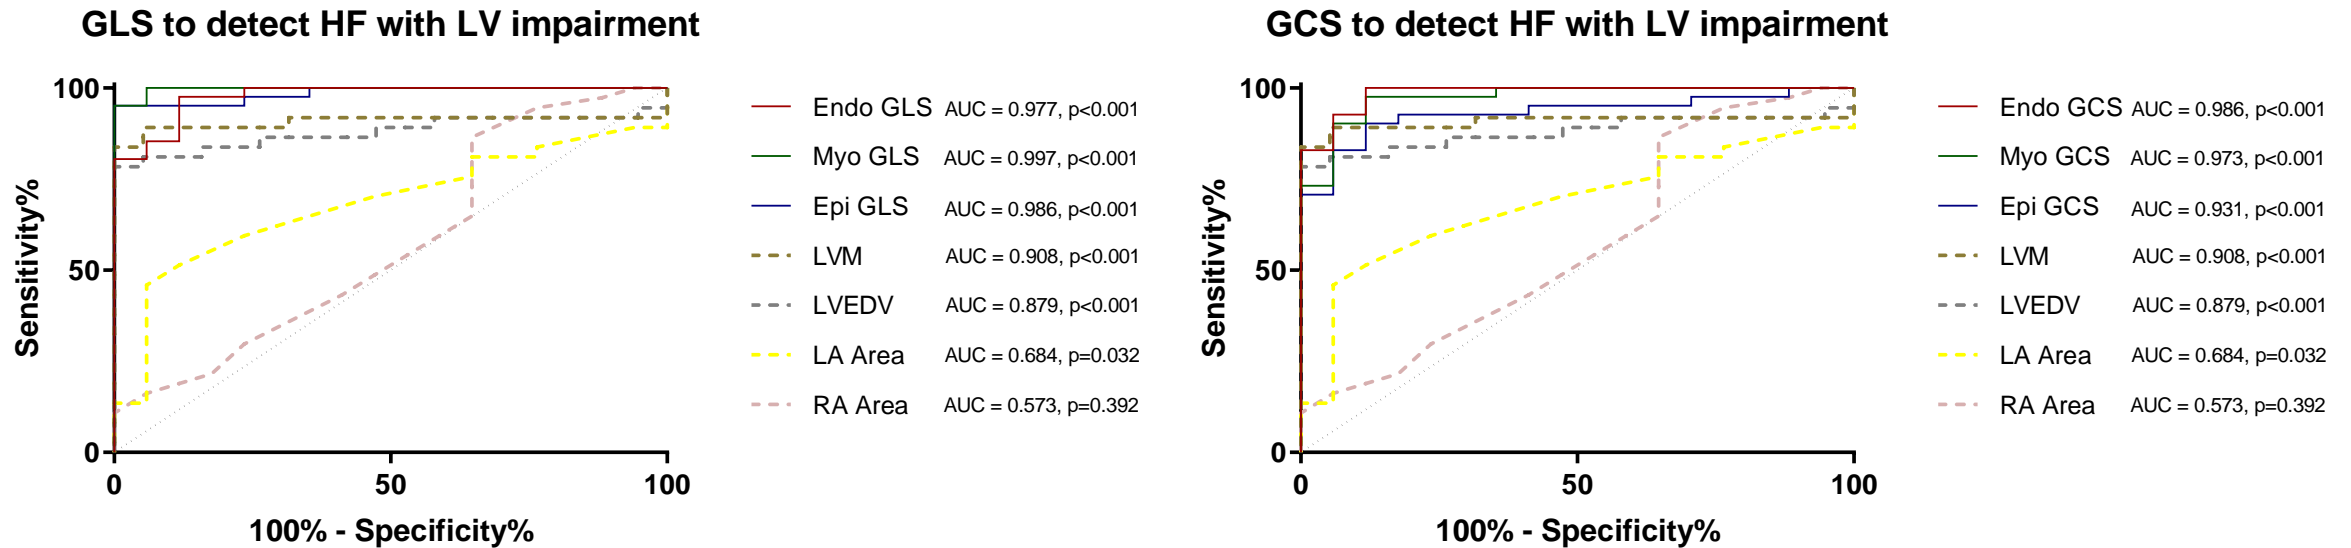

**Supplement Figure 4.** ROC analysis to discriminate patients with HF with LV impairment from Normal Subjects of multilayer A) GLS, and B) GCS(Endo GLS – sub-endocardial longitudinal strain, Myo GLS – mid-myocardial longitudinal strain, Epi GLS, sub-epicardial longitudinal strain, Endo GCS – sub-endocardial circumferential strain, Myo GCS – mid-myocardial circumferential strain, Epi GCS, sub-epicardial circumferential strain ). Dotted lines represent respectively LVM – indexed left ventricular mass, LVEDV – indexed LV end-diastolic volume, LA and RA area – indexed left atrial and right atrial areas.

## GLS to detect HFpEF

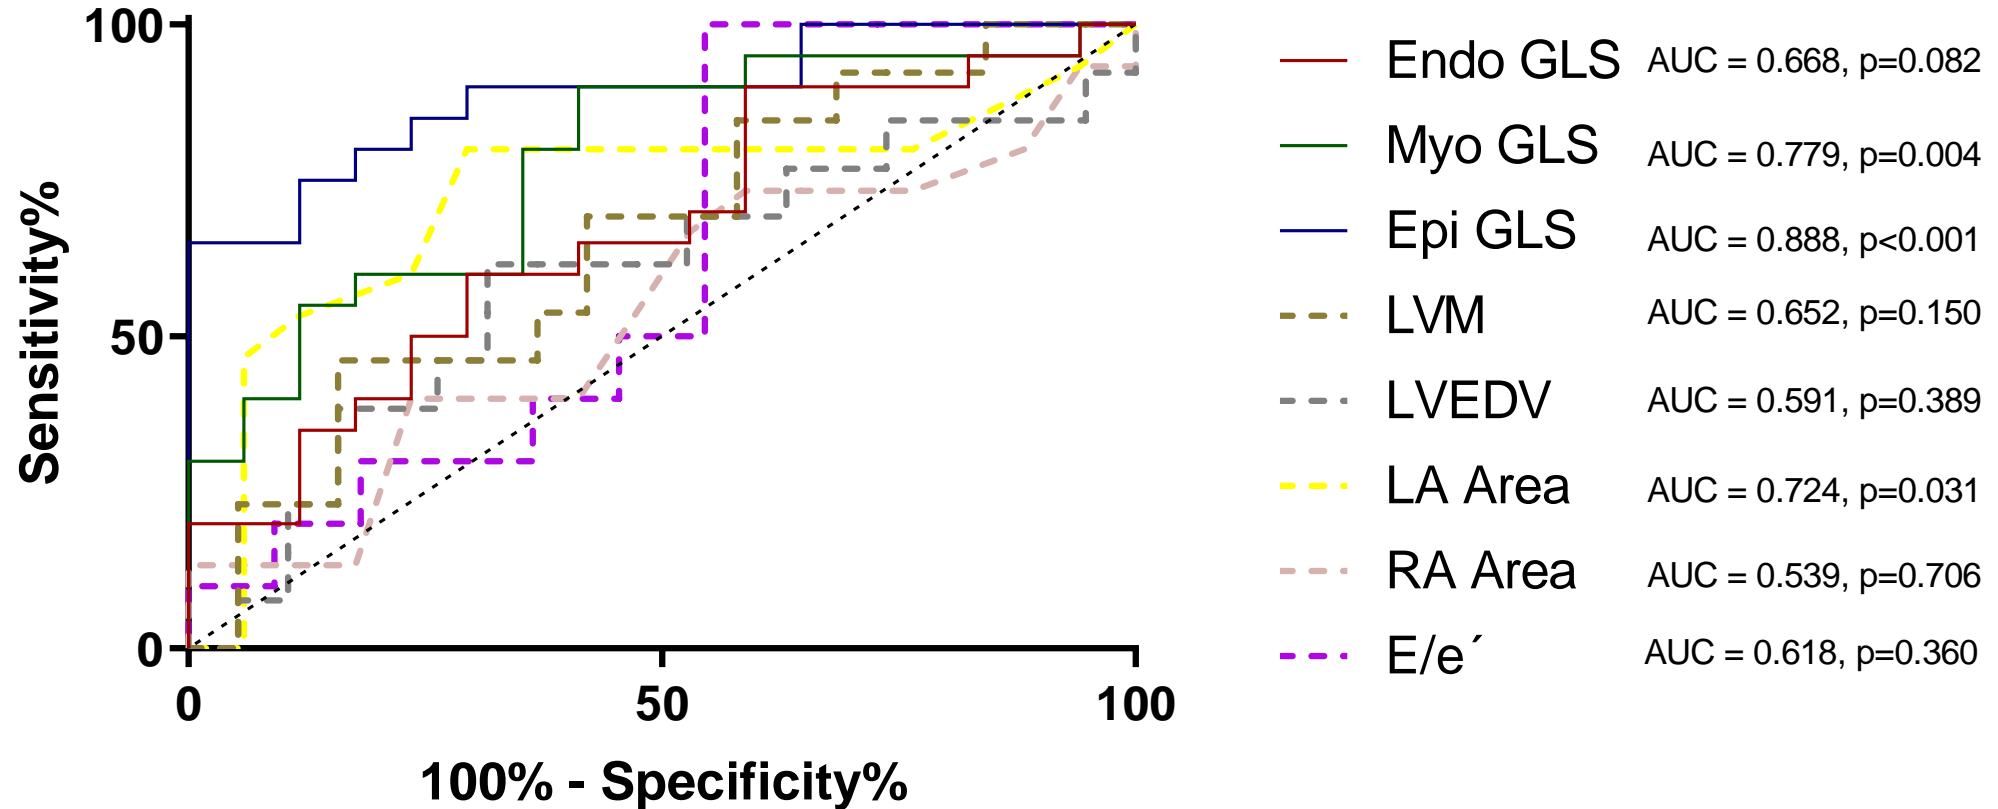

**Supplement Figure 5.** ROC analysis to discriminate patients with HF with preserved EF from Normal Subjects of multilayer A) Endo GLS – sub-endocardial longitudinal strain, Myo GLS – mid-myocardial longitudinal strain, Epi GLS, sub-epicardial longitudinal strain. Dotted lines represent respectively LVM – indexed left ventricular mass, LVEDV – indexed LV end-diastolic volume, LA and RA area – indexed left atrial and right atrial areas.

Supplement Table. Global and Regional Radial Strain in the 4 pathology groups

|                                      | Controls | HFpEF    | HFmrEF   | HFrEF    | P# Value<br>Controls vs<br>HFpEF | P# Value<br>Controls vs<br>HFmrEF | P# Value<br>HFpEF vs<br>HFmrEF | P# Value<br>HFmrEF<br>vs HFrEF |
|--------------------------------------|----------|----------|----------|----------|----------------------------------|-----------------------------------|--------------------------------|--------------------------------|
| Global Radial Strain (%)             |          |          |          |          |                                  |                                   |                                |                                |
|                                      | 94.8±28  | 91.4±36  | 50.5±19  | 34.6±20  | 0.98                             | <0.001                            | <0.001                         | 0.22                           |
| Global Radial Strain<br>Rate (%/s)   |          |          |          |          |                                  |                                   |                                |                                |
|                                      | 2.68±0.1 | 2.71±0.2 | 1.75±0.2 | 1.39±0.3 | 0.99                             | 0.0015                            | 0.0012                         | 0.17                           |
| Regional Radial Strain<br>(%)        |          |          |          |          |                                  |                                   |                                |                                |
| Basal                                | 99.1±50  | 99.8±49  | 44.4±22  | 25.6±14  | 0.99                             | <0.001                            | <0.001                         | 0.368                          |
| Mid                                  | 86.8±24  | 91.5±41  | 49.6±17  | 37.7±23  | 0.95                             | <0.001                            | <0.001                         | 0.53                           |
| Apical                               | 98.3±25  | 82.9±47  | 57.5±37  | 40.5±31  | 0.57                             | 0.005                             | 0.12                           | 0.44                           |
| Regional Radial Strain<br>Rate (%/s) |          |          |          |          |                                  |                                   |                                |                                |
| Basal                                | 2.74±0.8 | 2.55±0.7 | 1.59±0.6 | 1.08±0.5 | 0.79                             | <0.001                            | <0.001                         | 0.048                          |
| Mid                                  | 2.69±0.4 | 2.90±0.8 | 1.88±0.5 | 1.43±0.9 | 0.80                             | 0.005                             | <0.001                         | 0.18                           |
| Apical                               | 2.62±0.6 | 2.69±0.8 | 1.77±0.7 | 1.67±0.9 | 0.99                             | 0.006                             | 0.002                          | 0.97                           |

Normal – control subjects, HFpEF – patients with HF with preserved EF, HFmrEF patients with HF with mid-range reduced EF, HFrEF – patients with HF with reduced EF, Apical –apical segments, Mid – mid-ventricular segments, Basal – basal segments. A p value < 0.05 is considered significant.
